# Supplementary material
Source: publisher figshare collection journal article supplement (https://acs.figshare.com/ndownloader/files/13873286)
Supplement: Supplementary file 1 [file 13873286]

## Supporting Information

# Biocatalytic Continuous Manufacturing of Diabetes Drug: Plantwide Process Modeling, Optimization, and Environmental and Economic Analysis

Chi-Hung Ho, Jieran Yi and Xiaonan Wang\*

Department of Chemical and Biomolecular Engineering, National University of Singapore,  
Singapore, Singapore

Supporting Information is 12 pages and includes 6 tables (**Table S1, S2 S3 S4 S5 and S6**) and 2 figure (**Figure S1 and S2**).

### Table of Contents

|                                                                                                                                                                                                     |     |
|-----------------------------------------------------------------------------------------------------------------------------------------------------------------------------------------------------|-----|
| Table S1. Literature data for the determination of kinetic constant <sup>1</sup> .....                                                                                                              | S2  |
| Table S2. Implementation steps and parameters of surrogate-based optimization.....                                                                                                                  | S2  |
| Figure S1. Flowchart of surrogate-based optimization.....                                                                                                                                           | S3  |
| Table S3. Summary of the volumetric flow rate and dimensions of all equipment used in<br>biocatalytic continuous sitagliptin manufacturing .....                                                    | S3  |
| Table S4. Estimation of Free-On-Board cost of equipment used in biocatalytic continuous<br>sitagliptin manufacturing .....                                                                          | S4  |
| Table S5. Waste disposal and utility costs used in this present paper .....                                                                                                                         | S6  |
| Table S6. Mass balance across whole process.....                                                                                                                                                    | S7  |
| Figure S2. Sensitivity analysis on uncovered costs. To consider the effect of uncovered costs<br>to NPV, current Opex and Capex have been multiplied into multiplier ranging from 1 to 15.<br>..... | S13 |

**Table S1. Literature data for the determination of kinetic constant<sup>1</sup>**

| Time (hr) | Conversion | [A] (g L <sup>-1</sup> ) | ln[A] |
|-----------|------------|--------------------------|-------|
| 0         | 0%         | 200                      | 5.30  |
| 1.5       | 48%        | 104                      | 4.64  |
| 5         | 67%        | 66                       | 4.19  |
| 24        | 89%        | 22                       | 3.09  |

**Table S2. Implementation steps and parameters of surrogate-based optimization**

| Implementation step                              | 1. Initialization                                                                                                                                                                                                                  | 2. Fit response surface                                                                 | 3. Choose candidate point                                                                                            | 4. Termination                               |
|--------------------------------------------------|------------------------------------------------------------------------------------------------------------------------------------------------------------------------------------------------------------------------------------|-----------------------------------------------------------------------------------------|----------------------------------------------------------------------------------------------------------------------|----------------------------------------------|
|                                                  | Generate initial points to be evaluated                                                                                                                                                                                            | Approximate the objective function based on evaluated points to build a surrogate model | Generate the candidate points and pick the best one                                                                  | Stop once criterion met or go back to step 2 |
| Adopted parameters in pySOT                      | Experimental design : SymmetricLatinHypercube (Symmetric Latin hypercube design)                                                                                                                                                   | Surrogate model: RBFInterpolant (Radial basis function)                                 | Adaptive sampling: CandidateDYCORS (Dynamic coordinate search using response surface models)                         | Evaluation time: 3000 times                  |
| Other parameters                                 | <ul style="list-style-type: none"><li>Controller: ThreadController (for parallel computing)</li></ul>                                                                                                                              |                                                                                         | <ul style="list-style-type: none"><li>Strategy: SyncStrategyPenalty (for constrained optimization problem)</li></ul> |                                              |
| Upper bound & lower bound for decision variables | <ul style="list-style-type: none"><li>Concentration of prositagliptin ketone (mol m<sup>-3</sup>): [0, 400]</li><li>Length of reactor 7 (m): [0, 0.5542]</li><li>Flow rate (m<sup>3</sup> hr<sup>-1</sup>): [0, 0.00039]</li></ul> |                                                                                         |                                                                                                                      |                                              |

The Experimental design, Surrogate model, Adaptive sampling, Evaluation time, Controller and Strategy are parameters to be tune in pySOT that determine how the optimization is conducted. More details about these parameters can be refer to pySOT documentation.<sup>2</sup>

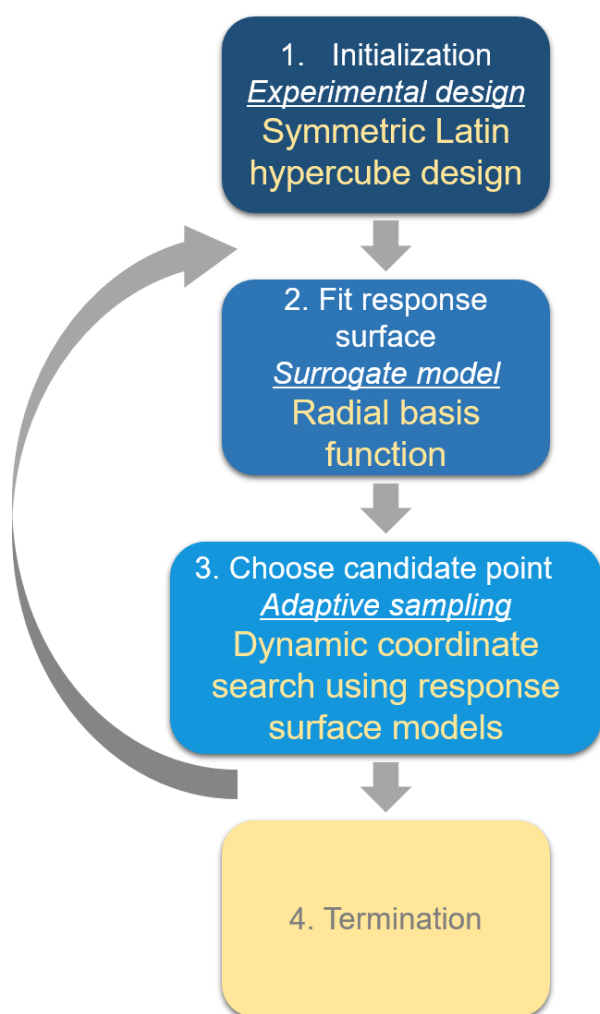

**Figure S1.** Flowchart of surrogate-based optimization.

**Table S3. Summary of the volumetric flow rate and dimensions of all equipment used in biocatalytic continuous sitagliptin manufacturing**

|                   | Reactor in Joliffe <i>et al.</i> |           |             |                   |                                |        |
|-------------------|----------------------------------|-----------|-------------|-------------------|--------------------------------|--------|
|                   | Reactor 1                        | Reactor 2 | Reactor 3   | Reactor 4         |                                |        |
| Flow rate (mL/hr) | 194.08                           | 26.57     | 208.06      | 26.53             |                                | 26.53  |
| Dimension (mL)    | 78.92                            | 10.80     | 84.61       | 10.79             |                                | 10.79  |
| Reactor 5         | Reactor 6                        | Reactor 7 | Reactor 8   |                   | Mixer in Joliffe <i>et al.</i> |        |
| 24.67             | 26.01                            | 130.01    | 304.2682167 | Flow rate (mL/hr) |                                | 121.69 |
| 10.03             | 10.58                            | 40        | 123.726544  | Dimension (kW)    |                                | 0.70   |
| Mixer 1           | Mixer 2                          | Mixer 3   | Mixer 4     | Mixer 5           | Mixer 6                        |        |
| 26.57             | 262.91                           | 208.06    | 26.53       | 26.53             | 255.09                         |        |
| 0.15              | 1.51                             | 1.20      | 0.15        | 0.15              | 1.47                           |        |
| Mixer 7           | Mixer 8                          | Mixer 9   | Mixer 10    | Mixer 11          | Mixer 12                       |        |
| 24.67             | 26.01                            | 78.01     | 78.70       | 308.59            | 46.71                          |        |
| 0.14              | 0.15                             | 0.45      | 0.45        | 1.78              | 0.27                           |        |
| Mixer 13          | Mixer 14                         | Mixer 15  | Mixer 16    | Mixer 17          | Dilution tank 1                |        |
| 276.60            | 273.26                           | 910.84    | 459.77      | 304.27            | 141.77                         |        |
| 1.59              | 1.57                             | 5.24      | 2.64        | 1.75              | 0.82                           |        |

|                                     |                                       |                             |                                         |                  |                   |
|-------------------------------------|---------------------------------------|-----------------------------|-----------------------------------------|------------------|-------------------|
| Dilution tank 2                     | Dilution tank 3                       | Condenser 1                 | Condenser 2                             | Condenser 3      | Condenser 4       |
| 78.01                               | 299.46                                | 224.53                      | 138.89                                  | 117.43           | 218.39            |
| 0.45                                | 1.72                                  | 1.29                        | 0.80                                    | 0.68             | 1.26              |
| Condenser 5                         | Condenser 6                           | Condenser 7                 | Condenser 8                             | Wash tank 1      |                   |
| 216.21                              | 413.79                                | 240.81                      | 41.38                                   | 12.67427123      | Flow rate (mL/hr) |
| 1.24                                | 2.38                                  | 1.39                        | 0.24                                    | 0.072906483      | Dimension         |
| Extraction in Joliffe <i>et al.</i> | Extraction 1                          | Extraction 2                | Extraction 3                            | Extraction 4     | Extraction 5      |
| 379.58                              | 262.91                                | 308.59                      | 276.60                                  | 273.26           | 910.8434483       |
| 5.00                                | 3.46                                  | 4.06                        | 3.64                                    | 3.60             | 11.99804321       |
|                                     | Crystallizer in Joliffe <i>et al.</i> | Crystallizer 1              | Crystallizer 2                          | Crystallizer 3   | Crystallizer 4    |
| Flow rate (mL/hr)                   | 14.39                                 | 333.0486097                 | 484.9792564                             | 226.0142894      | 302.9065788       |
| Dimension (m <sup>3</sup> )         | 0.2                                   | 4.628889641                 | 6.740503911                             | 3.141268789      | 4.2099594         |
|                                     | Filter in Joliffe <i>et al.</i>       | Filter 1                    | Filter 2                                | Filter 3         | Filter 4          |
| Flow rate (mL/hr)                   | 77.88                                 | 338.3536495                 | 26.53                                   | 484.9792564      | 416.9233803       |
| Dimension (m <sup>2</sup> )         | 0.5                                   | 2.172275613                 | 0.170326143                             | 3.11363159       | 2.676703777       |
| Filter 5                            | Filter 6                              |                             | Heat exchanger in Joliffe <i>et al.</i> | Heat exchanger 1 | Heat exchanger 2  |
| 459.7701149                         | 302.9065788                           | Flow rate (mL/hr)           | 28.78                                   | 26.56985129      | 26.53             |
| 2.951785535                         | 1.944700686                           | Dimension (m <sup>2</sup> ) | 20                                      | 18.46410791      | 18.43641418       |
| Heat exchanger 3                    | Heat exchanger 4                      |                             |                                         |                  |                   |
| 24.66536349                         | 26.01428939                           |                             |                                         |                  |                   |
| 17.14062786                         | 18.07803293                           |                             |                                         |                  |                   |

**Table S4. Estimation of Free-On-Board cost of equipment used in biocatalytic continuous sitagliptin manufacturing**

|             |             |                |                                  |                 |                 |
|-------------|-------------|----------------|----------------------------------|-----------------|-----------------|
|             | Reactor     |                | Reactor in Joliffe <i>et al.</i> | Reactor 1       | Reactor 2       |
| <i>n</i>    | 1           | Dimension (mL) | 80.000                           | 26.570          | 84.605          |
| <i>f</i>    | 1.0106      | Price (\$)     | 147,371                          | 20,556          | 160,971         |
| Reactor 3   | Reactor 4   | Reactor 5      | Reactor 6                        | Reactor 7       | Reactor 8       |
| 10.788      | 10.788      | 10.030         | 10.578                           | 40.000          | 123.727         |
| 20,526      | 20,526      | 19,083         | 20,127                           | 76,105          | 235,404         |
|             | Mixer       |                | Mixer in Joliffe <i>et al.</i>   | Mixer 1         | Mixer 2         |
| <i>n</i>    | 0.3         | Dimension (kW) | 5.000                            | 0.153           | 1.512           |
| <i>f</i>    | 1.1033      | Price (\$)     | 35,269                           | 13,967          | 27,781          |
| Mixer 3     | Mixer 4     | Mixer 5        | Mixer 6                          | Mixer 7         | Mixer 8         |
| 1.197       | 0.153       | 0.153          | 1.467                            | 0.142           | 0.150           |
| 25,898      | 13,961      | 13,961         | 27,530                           | 13,659          | 13,879          |
| Mixer 9     | Mixer 10    | Mixer 11       | Mixer 12                         | Mixer 13        | Mixer 14        |
| 0.449       | 0.453       | 1.775          | 0.269                            | 1.591           | 1.572           |
| 19,295      | 19,346      | 29,148         | 16,544                           | 28,207          | 28,104          |
| Mixer 15    | Mixer 16    | Mixer 17       | Dilution tank 1                  | Dilution tank 2 | Dilution tank 3 |
| 5.239       | 2.645       | 1.750          | 0.816                            | 0.449           | 1.723           |
| 40,331      | 32,852      | 29,025         | 23,082                           | 19,295          | 28,887          |
| Condenser 1 | Condenser 2 | Condenser 3    | Condenser 4                      | Condenser 5     | Condenser 6     |

|                                     |                               |                                       |                                         |                                 |                             |                                |
|-------------------------------------|-------------------------------|---------------------------------------|-----------------------------------------|---------------------------------|-----------------------------|--------------------------------|
|                                     | 1.292                         | 0.799                                 | 0.675                                   | 1.256                           | 1.244                       | 2.380                          |
|                                     | 26,496                        | 22,940                                | 21,814                                  | 26,277                          | 26,198                      | 31,830                         |
| Condenser 7                         | Condenser 8                   | Wash tank 1                           | Extraction                              |                                 |                             |                                |
|                                     | 1.385                         | 0.238                                 | 0.073                                   | $n$                             | 0.22                        | Dimension                      |
|                                     | 27,059                        | 15,953                                | 11,186                                  | $f$                             | 1.1033                      | Price (\$)                     |
| Extraction in Joliffe <i>et al.</i> | Extraction 1                  | Extraction 2                          | Extraction 3                            | Extraction 4                    | Extraction 5                |                                |
|                                     | 10.000                        | 3.463                                 | 4.065                                   | 3.643                           | 3.599                       | 11.998                         |
|                                     | 27,844                        | 24,863                                | 25,755                                  | 25,143                          | 25,075                      | 32,680                         |
| $n$                                 | Crystallizer                  |                                       | Crystallizer in Joliffe <i>et al.</i>   | Crystallizer 1                  | Crystallizer 2              |                                |
|                                     | 0.68                          | Dimension (m <sup>3</sup> )           |                                         | 75.000                          | 4.629                       | 6.741                          |
| $f$                                 | 1.1033                        | Price (\$)                            | 232,034                                 | 39,371                          | 50,835                      |                                |
| Crystallizer 3                      | Crystallizer 4                | Filter                                |                                         | Filter in Joliffe <i>et al.</i> |                             |                                |
|                                     | 3.141                         | 4.210                                 | $n$                                     | 0.6                             | Dimension (m <sup>2</sup> ) | 150.000                        |
|                                     | 30,247                        | 36,912                                | $f$                                     | 1.1033                          | Price (\$)                  | 211,336                        |
| Filter 1                            | Filter 2                      | Filter 3                              | Filter 4                                | Filter 5                        | Filter 6                    |                                |
|                                     | 2.172                         | 0.170                                 | 3.114                                   | 2.677                           | 2.952                       | 1.945                          |
|                                     | 18,776                        | 4,076                                 | 23,304                                  | 21,283                          | 22,569                      | 17,570                         |
| $n$                                 | Heat exchanger                |                                       | Heat exchanger in Joliffe <i>et al.</i> | Heat exchanger 1                | Heat exchanger 2            |                                |
|                                     | 0.71                          | Dimension (m <sup>2</sup> )           |                                         | 100.000                         | 18.464                      | 18.436                         |
| $f$                                 | 1.1033                        | Price (\$)                            | 64,969                                  | 22,077                          | 22,054                      |                                |
| Heat exchanger 3                    | Heat exchanger 4              | Distillation in Joliffe <i>et al.</i> |                                         | Distillation                    | Total                       |                                |
|                                     | 17.141                        | 18.078                                | Amount                                  | 6                               |                             |                                |
|                                     | 20,942                        | 21,749                                | Price (\$)                              | 8,385                           | 8,569                       | 51,415                         |
|                                     | Pump in Joliffe <i>et al.</i> | Pump                                  | Total                                   |                                 |                             | Dryer in Joliffe <i>et al.</i> |
| Amount                              |                               | 60                                    |                                         |                                 |                             |                                |
| Price (\$)                          | 1,368                         | 1,398                                 | 83,881                                  | Price (\$)                      | 31,038                      |                                |
| Dryer 1                             | Ultrafiltration 1             |                                       |                                         |                                 |                             |                                |
|                                     | 31,721                        | 600                                   |                                         |                                 |                             |                                |

The cost estimation of each type of equipment has been calculated based on **Equation 12** and the reference paper.<sup>3</sup>  $n$ ,  $f$ , dimension and price in the cell, for example, “Reactor in Joliffe *et al.*” represents  $n$ ,  $f$ ,  $S_A$  and  $Cost_A$  in **Equation 12**, respectively. This also applies to the other types of equipment. All FOB costs obtained by **Equation 12** are the prices of the year of 2016 by GBP.<sup>3</sup> Thus, the FOB costs obtained by **Equation 12** have been multiplied into an exchange rate of 1.4729 from GBP to USD and a mean inflation rate of 2.2% from January 1<sup>st</sup> 2017 to July 6<sup>th</sup> 2018.<sup>4,5</sup> The exchange rate has been sourced from FED on April 4<sup>th</sup> 2016, the publication date of the reference paper. All FOB costs of the reference paper have also been multiplied into an exchange rate of 1.4279. In the reference paper, all distillation equipment has the same price regardless of the incoming volumetric flow rate; therefore, this has been also considered here. As for the Dryer 1 used in this present paper, since there is limited volumetric flow rate, considering the similar order of magnitude of scale with that of dryer used in reference paper, the same price multiplied into inflation rate and exchange rate has been used.<sup>3</sup> Dilution tank and condenser are simple equipment that are regarded as mixers. Lastly, the price of ultrafiltration membrane has been sourced from vendor.<sup>6</sup>

**Table S5. Waste disposal and utility costs used in this present paper**

| Waste disposal costs in reference | The exchange rate of GBP to USD on April 4 <sup>th</sup> 2016 | Mean inflation rate from January 1 <sup>st</sup> 2017 to July 6 <sup>th</sup> 2018 | Waste disposal costs in this paper |
|-----------------------------------|---------------------------------------------------------------|------------------------------------------------------------------------------------|------------------------------------|
| \$ 0.35/L                         |                                                               |                                                                                    | \$0.51/L                           |
| Utility costs in reference        | 1.427                                                         | 1.022                                                                              | Utility costs in this paper        |
| \$0.95/kg                         |                                                               |                                                                                    | \$1.4/kg                           |

\$1.4/kg and \$0.51/L come from 1.4279, the exchange rate of GBP to USD on April 4 2016 times 1.022 (inflation rate), and times \$0.96/kg and \$0.35/L respectively, which are used in the publication of Jolliffe *et al.*<sup>3-5</sup>

**Table S6. Mass balance across whole process**

| Mass flow rate (kg/hr)          | 1       | 2       | 3       | 4       | 5       | 6       | 7       | 8       | 9       | 10      | 11      | 12      | 13      | 14      | 15      | 16      | 17      | 18<br>(solid) | 18<br>(solution) | 19      | 20      | 21      |
|---------------------------------|---------|---------|---------|---------|---------|---------|---------|---------|---------|---------|---------|---------|---------|---------|---------|---------|---------|---------------|------------------|---------|---------|---------|
| 1                               | 0.03409 | 0.00000 | 0.03409 | 0.00341 | 0.00000 | 0.00000 | 0.00341 | 0.00068 | 0.00273 | 0.00000 | 0.00273 | 0.00273 | 0.00000 | 0.00273 | 0.00273 | 0.00000 | 0.00000 | 0.00000       | 0.00273          | 0.00000 | 0.00273 | 0.00000 |
| H <sub>2</sub> O                | 0.00000 | 0.02657 | 0.02657 | 0.02657 | 0.00000 | 0.00000 | 0.02657 | 0.02657 | 0.00000 | 0.00000 | 0.00000 | 0.00000 | 0.00000 | 0.00000 | 0.00000 | 0.00000 | 0.00000 | 0.00000       | 0.00000          | 0.00000 | 0.00000 | 0.00000 |
| NH <sub>2</sub> NH <sub>2</sub> | 0.00000 | 0.01431 | 0.01431 | 0.00572 | 0.00000 | 0.00000 | 0.00572 | 0.00572 | 0.00000 | 0.00000 | 0.00000 | 0.00000 | 0.00000 | 0.00000 | 0.00000 | 0.00000 | 0.00000 | 0.00000       | 0.00000          | 0.00000 | 0.00000 | 0.00000 |
| 2                               | 0.00000 | 0.00000 | 0.00000 | 0.02950 | 0.00000 | 0.00000 | 0.02950 | 0.00361 | 0.02589 | 0.00000 | 0.02589 | 0.02589 | 0.00000 | 0.02589 | 0.00777 | 0.00000 | 0.00000 | 0.00000       | 0.00777          | 0.00000 | 0.00777 | 0.00000 |
| HCl                             | 0.00000 | 0.00000 | 0.00000 | 0.00977 | 0.00000 | 0.00000 | 0.00977 | 0.00977 | 0.00000 | 0.00000 | 0.00000 | 0.00000 | 0.00000 | 0.00000 | 0.00000 | 0.00000 | 0.00000 | 0.00000       | 0.00000          | 0.00000 | 0.00000 | 0.00000 |
| 2-propanol                      | 0.00000 | 0.00000 | 0.00000 | 0.00000 | 0.00147 | 0.02950 | 0.02950 | 0.00000 | 0.02950 | 0.02802 | 0.00147 | 0.01353 | 0.00000 | 0.01353 | 0.01353 | 0.00000 | 0.00000 | 0.00000       | 0.01353          | 0.00000 | 0.01353 | 0.00000 |
| dichloromethane                 | 0.00000 | 0.00000 | 0.00000 | 0.00000 | 0.01327 | 0.26548 | 0.26548 | 0.00000 | 0.26548 | 0.25220 | 0.01327 | 0.01327 | 0.00000 | 0.01327 | 0.01327 | 0.00000 | 0.00000 | 0.00000       | 0.01327          | 0.00000 | 0.01327 | 0.00000 |
| IPAc                            | 0.00000 | 0.00000 | 0.00000 | 0.00000 | 0.00000 | 0.00000 | 0.00000 | 0.00000 | 0.00000 | 0.00000 | 0.00000 | 0.10000 | 0.00000 | 0.10000 | 0.10000 | 0.00000 | 0.00000 | 0.00000       | 0.10000          | 0.00000 | 0.10000 | 0.00000 |
| 3                               | 0.00000 | 0.00000 | 0.00000 | 0.00000 | 0.00000 | 0.00000 | 0.00000 | 0.00000 | 0.00000 | 0.00000 | 0.00000 | 0.00000 | 0.09877 | 0.09877 | 0.02963 | 0.00000 | 0.00000 | 0.00000       | 0.02963          | 0.00000 | 0.02963 | 0.00000 |
| 4                               | 0.00000 | 0.00000 | 0.00000 | 0.00000 | 0.00000 | 0.00000 | 0.00000 | 0.00000 | 0.00000 | 0.00000 | 0.00000 | 0.00000 | 0.00000 | 0.00000 | 0.04973 | 0.00000 | 0.00000 | 0.03481       | 0.01492          | 0.00000 | 0.01492 | 0.00000 |
| Trifluoroacetic acid            | 0.00000 | 0.00000 | 0.00000 | 0.00000 | 0.00000 | 0.00000 | 0.00000 | 0.00000 | 0.00000 | 0.00000 | 0.00000 | 0.00000 | 0.00000 | 0.00000 | 0.03753 | 0.00000 | 0.00000 | 0.00000       | 0.03753          | 0.00000 | 0.03753 | 0.00000 |
| heptane                         | 0.00000 | 0.00000 | 0.00000 | 0.00000 | 0.00000 | 0.00000 | 0.00000 | 0.00000 | 0.00000 | 0.00000 | 0.00000 | 0.00000 | 0.00000 | 0.00000 | 0.00000 | 0.10000 | 0.00500 | 0.00000       | 0.00000          | 0.00000 | 0.00000 | 0.09500 |
| Superphosphoric acid            | 0.00000 | 0.00000 | 0.00000 | 0.00000 | 0.00000 | 0.00000 | 0.00000 | 0.00000 | 0.00000 | 0.00000 | 0.00000 | 0.00000 | 0.00000 | 0.00000 | 0.00000 | 0.00000 | 0.00000 | 0.00000       | 0.00000          | 0.01000 | 0.01000 | 0.00000 |
| 5                               | 0.00000 | 0.00000 | 0.00000 | 0.00000 | 0.00000 | 0.00000 | 0.00000 | 0.00000 | 0.00000 | 0.00000 | 0.00000 | 0.00000 | 0.00000 | 0.00000 | 0.00000 | 0.00000 | 0.00000 | 0.00000       | 0.00000          | 0.00000 | 0.00000 | 0.00000 |
| H <sub>2</sub> gas              | 0.00000 | 0.00000 | 0.00000 | 0.00000 | 0.00000 | 0.00000 | 0.00000 | 0.00000 | 0.00000 | 0.00000 | 0.00000 | 0.00000 | 0.00000 | 0.00000 | 0.00000 | 0.00000 | 0.00000 | 0.00000       | 0.00000          | 0.00000 | 0.00000 | 0.00000 |
| 6                               | 0.00000 | 0.00000 | 0.00000 | 0.00000 | 0.00000 | 0.00000 | 0.00000 | 0.00000 | 0.00000 | 0.00000 | 0.00000 | 0.00000 | 0.00000 | 0.00000 | 0.00000 | 0.00000 | 0.00000 | 0.00000       | 0.00000          | 0.00000 | 0.00000 | 0.00000 |
| 7                               | 0.00000 | 0.00000 | 0.00000 | 0.00000 | 0.00000 | 0.00000 | 0.00000 | 0.00000 | 0.00000 | 0.00000 | 0.00000 | 0.00000 | 0.00000 | 0.00000 | 0.00000 | 0.00000 | 0.00000 | 0.00000       | 0.00000          | 0.00000 | 0.00000 | 0.00000 |
| IPA                             | 0.00000 | 0.00000 | 0.00000 | 0.00000 | 0.00000 | 0.00000 | 0.00000 | 0.00000 | 0.00000 | 0.00000 | 0.00000 | 0.00000 | 0.00000 | 0.00000 | 0.00000 | 0.00000 | 0.00000 | 0.00000       | 0.00000          | 0.00000 | 0.00000 | 0.00000 |
| 8                               | 0.00000 | 0.00000 | 0.00000 | 0.00000 | 0.00000 | 0.00000 | 0.00000 | 0.00000 | 0.00000 | 0.00000 | 0.00000 | 0.00000 | 0.00000 | 0.00000 | 0.00000 | 0.00000 | 0.00000 | 0.00000       | 0.00000          | 0.00000 | 0.00000 | 0.00000 |
| 9                               | 0.00000 | 0.00000 | 0.00000 | 0.00000 | 0.00000 | 0.00000 | 0.00000 | 0.00000 | 0.00000 | 0.00000 | 0.00000 | 0.00000 | 0.00000 | 0.00000 | 0.00000 | 0.00000 | 0.00000 | 0.00000       | 0.00000          | 0.00000 | 0.00000 | 0.00000 |
| PivCl                           | 0.00000 | 0.00000 | 0.00000 | 0.00000 | 0.00000 | 0.00000 | 0.00000 | 0.00000 | 0.00000 | 0.00000 | 0.00000 | 0.00000 | 0.00000 | 0.00000 | 0.00000 | 0.00000 | 0.00000 | 0.00000       | 0.00000          | 0.00000 | 0.00000 | 0.00000 |
| IPEA                            | 0.00000 | 0.00000 | 0.00000 | 0.00000 | 0.00000 | 0.00000 | 0.00000 | 0.00000 | 0.00000 | 0.00000 | 0.00000 | 0.00000 | 0.00000 | 0.00000 | 0.00000 | 0.00000 | 0.00000 | 0.00000       | 0.00000          | 0.00000 | 0.00000 | 0.00000 |
| 10                              | 0.00000 | 0.00000 | 0.00000 | 0.00000 | 0.00000 | 0.00000 | 0.00000 | 0.00000 | 0.00000 | 0.00000 | 0.00000 | 0.00000 | 0.00000 | 0.00000 | 0.00000 | 0.00000 | 0.00000 | 0.00000       | 0.00000          | 0.00000 | 0.00000 | 0.00000 |
| by-product from R5              | 0.00000 | 0.00000 | 0.00000 | 0.00000 | 0.00000 | 0.00000 | 0.00000 | 0.00000 | 0.00000 | 0.00000 | 0.00000 | 0.00000 | 0.00000 | 0.00000 | 0.00000 | 0.00000 | 0.00000 | 0.00000       | 0.00000          | 0.00000 | 0.00000 | 0.00000 |
| TFA                             | 0.00000 | 0.00000 | 0.00000 | 0.00000 | 0.00000 | 0.00000 | 0.00000 | 0.00000 | 0.00000 | 0.00000 | 0.00000 | 0.00000 | 0.00000 | 0.00000 | 0.00000 | 0.00000 | 0.00000 | 0.00000       | 0.00000          | 0.00000 | 0.00000 | 0.00000 |
| 11                              | 0.00000 | 0.00000 | 0.00000 | 0.00000 | 0.00000 | 0.00000 | 0.00000 | 0.00000 | 0.00000 | 0.00000 | 0.00000 | 0.00000 | 0.00000 | 0.00000 | 0.00000 | 0.00000 | 0.00000 | 0.00000       | 0.00000          | 0.00000 | 0.00000 | 0.00000 |
| by-product from R6              | 0.00000 | 0.00000 | 0.00000 | 0.00000 | 0.00000 | 0.00000 | 0.00000 | 0.00000 | 0.00000 | 0.00000 | 0.00000 | 0.00000 | 0.00000 | 0.00000 | 0.00000 | 0.00000 | 0.00000 | 0.00000       | 0.00000          | 0.00000 | 0.00000 | 0.00000 |
| DMSO                            | 0.00000 | 0.00000 | 0.00000 | 0.00000 | 0.00000 | 0.00000 | 0.00000 | 0.00000 | 0.00000 | 0.00000 | 0.00000 | 0.00000 | 0.00000 | 0.00000 | 0.00000 | 0.00000 | 0.00000 | 0.00000       | 0.00000          | 0.00000 | 0.00000 | 0.00000 |
| i-PrNH <sub>2</sub>             | 0.00000 | 0.00000 | 0.00000 | 0.00000 | 0.00000 | 0.00000 | 0.00000 | 0.00000 | 0.00000 | 0.00000 | 0.00000 | 0.00000 | 0.00000 | 0.00000 | 0.00000 | 0.00000 | 0.00000 | 0.00000       | 0.00000          | 0.00000 | 0.00000 | 0.00000 |
| 12                              | 0.00000 | 0.00000 | 0.00000 | 0.00000 | 0.00000 | 0.00000 | 0.00000 | 0.00000 | 0.00000 | 0.00000 | 0.00000 | 0.00000 | 0.00000 | 0.00000 | 0.00000 | 0.00000 | 0.00000 | 0.00000       | 0.00000          | 0.00000 | 0.00000 | 0.00000 |
| Acetone                         | 0.00000 | 0.00000 | 0.00000 | 0.00000 | 0.00000 | 0.00000 | 0.00000 | 0.00000 | 0.00000 | 0.00000 | 0.00000 | 0.00000 | 0.00000 | 0.00000 | 0.00000 | 0.00000 | 0.00000 | 0.00000       | 0.00000          | 0.00000 | 0.00000 | 0.00000 |
| by-product from R7              | 0.00000 | 0.00000 | 0.00000 | 0.00000 | 0.00000 | 0.00000 | 0.00000 | 0.00000 | 0.00000 | 0.00000 | 0.00000 | 0.00000 | 0.00000 | 0.00000 | 0.00000 | 0.00000 | 0.00000 | 0.00000       | 0.00000          | 0.00000 | 0.00000 | 0.00000 |
| NaOH                            | 0.00000 | 0.00000 | 0.00000 | 0.00000 | 0.00000 | 0.00000 | 0.00000 | 0.00000 | 0.00000 | 0.00000 | 0.00000 | 0.00000 | 0.00000 | 0.00000 | 0.00000 | 0.00000 | 0.00000 | 0.00000       | 0.00000          | 0.00000 | 0.00000 | 0.00000 |
| NaCl                            | 0.00000 | 0.00000 | 0.00000 | 0.00000 | 0.00000 | 0.00000 | 0.00000 | 0.00000 | 0.00000 | 0.00000 | 0.00000 | 0.00000 | 0.00000 | 0.00000 | 0.00000 | 0.00000 | 0.00000 | 0.00000       | 0.00000          | 0.00000 | 0.00000 | 0.00000 |
| Brine                           | 0.00000 | 0.00000 | 0.00000 | 0.00000 | 0.00000 | 0.00000 | 0.00000 | 0.00000 | 0.00000 | 0.00000 | 0.00000 | 0.00000 | 0.00000 | 0.00000 | 0.00000 | 0.00000 | 0.00000 | 0.00000       | 0.00000          | 0.00000 | 0.00000 | 0.00000 |
| Ethanol                         | 0.00000 | 0.00000 | 0.00000 | 0.00000 | 0.00000 | 0.00000 | 0.00000 | 0.00000 | 0.00000 | 0.00000 | 0.00000 | 0.00000 | 0.00000 | 0.00000 | 0.00000 | 0.00000 | 0.00000 | 0.00000       | 0.00000          | 0.00000 | 0.00000 | 0.00000 |
| Phosphoric acid                 | 0.00000 | 0.00000 | 0.00000 | 0.00000 | 0.00000 | 0.00000 | 0.00000 | 0.00000 | 0.00000 | 0.00000 | 0.00000 | 0.00000 | 0.00000 | 0.00000 | 0.00000 | 0.00000 | 0.00000 | 0.00000       | 0.00000          | 0.00000 | 0.00000 | 0.00000 |
| 13                              | 0.00000 | 0.00000 | 0.00000 | 0.00000 | 0.00000 | 0.00000 | 0.00000 | 0.00000 | 0.00000 | 0.00000 | 0.00000 | 0.00000 | 0.00000 | 0.00000 | 0.00000 | 0.00000 | 0.00000 | 0.00000       | 0.00000          | 0.00000 | 0.00000 | 0.00000 |

| Mass flow rate (kg/hr)          | 22      | 23      | 24      | 25      | 26      | 27      | 28      | 29      | 30      | 31      | 32      | 33      | 34      | 35      | 36      | 37<br>(Pd<br>catalyst) | 38      | 39      | 40      | 41      | 42      | 43      |
|---------------------------------|---------|---------|---------|---------|---------|---------|---------|---------|---------|---------|---------|---------|---------|---------|---------|------------------------|---------|---------|---------|---------|---------|---------|
| 1                               | 0.00000 | 0.00000 | 0.00000 | 0.00000 | 0.00000 | 0.00273 | 0.00000 | 0.00000 | 0.00000 | 0.00000 | 0.00000 | 0.00000 | 0.00000 | 0.00000 | 0.00000 | 0.00000                | 0.00000 | 0.00000 | 0.00000 | 0.00000 | 0.00000 |         |
| H <sub>2</sub> O                | 0.00000 | 0.00000 | 0.00000 | 0.00000 | 0.00000 | 0.00000 | 0.00000 | 0.00000 | 0.00000 | 0.00000 | 0.00000 | 0.00000 | 0.00000 | 0.00000 | 0.00000 | 0.00000                | 0.00000 | 0.22857 | 0.00000 | 0.00000 | 0.00000 | 0.22857 |
| NH <sub>2</sub> NH <sub>2</sub> | 0.00000 | 0.00000 | 0.00000 | 0.00000 | 0.00000 | 0.00000 | 0.00000 | 0.00000 | 0.00000 | 0.00000 | 0.00000 | 0.00000 | 0.00000 | 0.00000 | 0.00000 | 0.00000                | 0.00000 | 0.00000 | 0.00000 | 0.00000 | 0.00000 |         |
| 2                               | 0.00000 | 0.00000 | 0.00000 | 0.00000 | 0.00000 | 0.00777 | 0.00000 | 0.00000 | 0.00000 | 0.00000 | 0.00000 | 0.00000 | 0.00000 | 0.00000 | 0.00000 | 0.00000                | 0.00000 | 0.00000 | 0.00000 | 0.00000 | 0.00000 |         |
| HCl                             | 0.00000 | 0.00000 | 0.00000 | 0.00000 | 0.00000 | 0.00000 | 0.00000 | 0.00000 | 0.00000 | 0.00000 | 0.00000 | 0.00000 | 0.00000 | 0.00000 | 0.00000 | 0.00000                | 0.00000 | 0.09698 | 0.00000 | 0.00000 | 0.00000 | 0.10000 |
| 2-propanol                      | 0.01218 | 0.00012 | 0.01206 | 0.00000 | 0.01206 | 0.00135 | 0.00000 | 0.00000 | 0.00000 | 0.00000 | 0.00000 | 0.00000 | 0.00000 | 0.00000 | 0.00000 | 0.00000                | 0.00000 | 0.00000 | 0.00000 | 0.00000 | 0.00000 |         |
| dichloromethane                 | 0.00000 | 0.00000 | 0.00000 | 0.00000 | 0.00000 | 0.01327 | 0.00000 | 0.00000 | 0.00000 | 0.00000 | 0.00000 | 0.00000 | 0.00000 | 0.00000 | 0.00000 | 0.00000                | 0.00000 | 0.00000 | 0.00000 | 0.00000 | 0.00000 |         |
| IPAc                            | 0.09000 | 0.00090 | 0.08910 | 0.01090 | 0.10000 | 0.01000 | 0.00000 | 0.00000 | 0.00000 | 0.00000 | 0.00000 | 0.00000 | 0.00000 | 0.00000 | 0.00000 | 0.00000                | 0.00000 | 0.00000 | 0.00000 | 0.00000 | 0.00000 |         |
| 3                               | 0.00000 | 0.00000 | 0.00000 | 0.00000 | 0.00000 | 0.02963 | 0.00000 | 0.00000 | 0.00000 | 0.00000 | 0.00000 | 0.00000 | 0.00000 | 0.00000 | 0.00000 | 0.00000                | 0.00000 | 0.00000 | 0.00000 | 0.00000 | 0.00000 |         |
| 4                               | 0.00000 | 0.00000 | 0.00000 | 0.00000 | 0.00000 | 0.01492 | 0.03481 | 0.00000 | 0.03481 | 0.00348 | 0.00348 | 0.00000 | 0.00000 | 0.00000 | 0.00348 | 0.00000                | 0.00348 | 0.00348 | 0.00000 | 0.00000 | 0.00000 |         |
| Trifluoroacetic acid            | 0.00000 | 0.00000 | 0.00000 | 0.00000 | 0.00000 | 0.03753 | 0.00000 | 0.00000 | 0.00000 | 0.01182 | 0.01182 | 0.00000 | 0.00000 | 0.00000 | 0.01182 | 0.00000                | 0.01182 | 0.01182 | 0.00000 | 0.00000 | 0.00000 |         |
| heptane                         | 0.00000 | 0.00000 | 0.00000 | 0.00000 | 0.00000 | 0.00500 | 0.00000 | 0.00000 | 0.00000 | 0.00000 | 0.00000 | 0.00000 | 0.00000 | 0.00000 | 0.00000 | 0.00000                | 0.00000 | 0.00000 | 0.00000 | 0.00000 | 0.00000 |         |
| Superphosphoric acid            | 0.00000 | 0.00000 | 0.00000 | 0.00000 | 0.00000 | 0.01000 | 0.00000 | 0.05000 | 0.05000 | 0.05000 | 0.05000 | 0.00000 | 0.00000 | 0.00000 | 0.05000 | 0.00000                | 0.05000 | 0.05000 | 0.00000 | 0.00000 | 0.00000 |         |
| 5                               | 0.00000 | 0.00000 | 0.00000 | 0.00000 | 0.00000 | 0.00000 | 0.00000 | 0.00000 | 0.00000 | 0.01951 | 0.01951 | 0.00000 | 0.00000 | 0.00000 | 0.00390 | 0.00000                | 0.00390 | 0.00390 | 0.00000 | 0.00000 | 0.00000 |         |
| H <sub>2</sub> gas              | 0.00000 | 0.00000 | 0.00000 | 0.00000 | 0.00000 | 0.00000 | 0.00000 | 0.00000 | 0.00000 | 0.00000 | 0.00000 | 0.01000 | 0.00967 | 0.00033 | 0.00000 | 0.00000                | 0.00000 | 0.00000 | 0.00000 | 0.00000 | 0.00000 |         |
| 6                               | 0.00000 | 0.00000 | 0.00000 | 0.00000 | 0.00000 | 0.00000 | 0.00000 | 0.00000 | 0.00000 | 0.00000 | 0.00000 | 0.00000 | 0.00000 | 0.00000 | 0.01577 | 0.00000                | 0.01577 | 0.00000 | 0.00000 | 0.00000 | 0.00000 |         |
| 7                               | 0.00000 | 0.00000 | 0.00000 | 0.00000 | 0.00000 | 0.00000 | 0.00000 | 0.00000 | 0.00000 | 0.00000 | 0.00000 | 0.00000 | 0.00000 | 0.00000 | 0.00000 | 0.00000                | 0.00000 | 0.01880 | 0.00000 | 0.00000 | 0.00000 |         |
| IPA                             | 0.00000 | 0.00000 | 0.00000 | 0.00000 | 0.00000 | 0.00000 | 0.00000 | 0.00000 | 0.00000 | 0.00000 | 0.00000 | 0.00000 | 0.00000 | 0.00000 | 0.00000 | 0.00000                | 0.00000 | 0.00000 | 0.20000 | 0.01000 | 0.19000 |         |
| 8                               | 0.00000 | 0.00000 | 0.00000 | 0.00000 | 0.00000 | 0.00000 | 0.00000 | 0.00000 | 0.00000 | 0.00000 | 0.00000 | 0.00000 | 0.00000 | 0.00000 | 0.00000 | 0.00000                | 0.00000 | 0.00000 | 0.00000 | 0.00000 | 0.00000 |         |
| 9                               | 0.00000 | 0.00000 | 0.00000 | 0.00000 | 0.00000 | 0.00000 | 0.00000 | 0.00000 | 0.00000 | 0.00000 | 0.00000 | 0.00000 | 0.00000 | 0.00000 | 0.00000 | 0.00000                | 0.00000 | 0.00000 | 0.00000 | 0.00000 | 0.00000 |         |
| PivCl                           | 0.00000 | 0.00000 | 0.00000 | 0.00000 | 0.00000 | 0.00000 | 0.00000 | 0.00000 | 0.00000 | 0.00000 | 0.00000 | 0.00000 | 0.00000 | 0.00000 | 0.00000 | 0.00000                | 0.00000 | 0.00000 | 0.00000 | 0.00000 | 0.00000 |         |
| IPEA                            | 0.00000 | 0.00000 | 0.00000 | 0.00000 | 0.00000 | 0.00000 | 0.00000 | 0.00000 | 0.00000 | 0.00000 | 0.00000 | 0.00000 | 0.00000 | 0.00000 | 0.00000 | 0.00000                | 0.00000 | 0.00000 | 0.00000 | 0.00000 | 0.00000 |         |
| 10                              | 0.00000 | 0.00000 | 0.00000 | 0.00000 | 0.00000 | 0.00000 | 0.00000 | 0.00000 | 0.00000 | 0.00000 | 0.00000 | 0.00000 | 0.00000 | 0.00000 | 0.00000 | 0.00000                | 0.00000 | 0.00000 | 0.00000 | 0.00000 | 0.00000 |         |
| by-product from R5              | 0.00000 | 0.00000 | 0.00000 | 0.00000 | 0.00000 | 0.00000 | 0.00000 | 0.00000 | 0.00000 | 0.00000 | 0.00000 | 0.00000 | 0.00000 | 0.00000 | 0.00000 | 0.00000                | 0.00000 | 0.00000 | 0.00000 | 0.00000 | 0.00000 |         |
| TFA                             | 0.00000 | 0.00000 | 0.00000 | 0.00000 | 0.00000 | 0.00000 | 0.00000 | 0.00000 | 0.00000 | 0.00000 | 0.00000 | 0.00000 | 0.00000 | 0.00000 | 0.00000 | 0.00000                | 0.00000 | 0.00000 | 0.00000 | 0.00000 | 0.00000 |         |
| 11                              | 0.00000 | 0.00000 | 0.00000 | 0.00000 | 0.00000 | 0.00000 | 0.00000 | 0.00000 | 0.00000 | 0.00000 | 0.00000 | 0.00000 | 0.00000 | 0.00000 | 0.00000 | 0.00000                | 0.00000 | 0.00000 | 0.00000 | 0.00000 | 0.00000 |         |
| by-product from R6              | 0.00000 | 0.00000 | 0.00000 | 0.00000 | 0.00000 | 0.00000 | 0.00000 | 0.00000 | 0.00000 | 0.00000 | 0.00000 | 0.00000 | 0.00000 | 0.00000 | 0.00000 | 0.00000                | 0.00000 | 0.00000 | 0.00000 | 0.00000 | 0.00000 |         |
| DMSO                            | 0.00000 | 0.00000 | 0.00000 | 0.00000 | 0.00000 | 0.00000 | 0.00000 | 0.00000 | 0.00000 | 0.00000 | 0.00000 | 0.00000 | 0.00000 | 0.00000 | 0.00000 | 0.00000                | 0.00000 | 0.00000 | 0.00000 | 0.00000 | 0.00000 |         |
| <i>i</i> -PrNH <sub>2</sub>     | 0.00000 | 0.00000 | 0.00000 | 0.00000 | 0.00000 | 0.00000 | 0.00000 | 0.00000 | 0.00000 | 0.00000 | 0.00000 | 0.00000 | 0.00000 | 0.00000 | 0.00000 | 0.00000                | 0.00000 | 0.00000 | 0.00000 | 0.00000 | 0.00000 |         |
| 12                              | 0.00000 | 0.00000 | 0.00000 | 0.00000 | 0.00000 | 0.00000 | 0.00000 | 0.00000 | 0.00000 | 0.00000 | 0.00000 | 0.00000 | 0.00000 | 0.00000 | 0.00000 | 0.00000                | 0.00000 | 0.00000 | 0.00000 | 0.00000 | 0.00000 |         |
| Acetone                         | 0.00000 | 0.00000 | 0.00000 | 0.00000 | 0.00000 | 0.00000 | 0.00000 | 0.00000 | 0.00000 | 0.00000 | 0.00000 | 0.00000 | 0.00000 | 0.00000 | 0.00000 | 0.00000                | 0.00000 | 0.00000 | 0.00000 | 0.00000 | 0.00000 |         |
| by-product from R7              | 0.00000 | 0.00000 | 0.00000 | 0.00000 | 0.00000 | 0.00000 | 0.00000 | 0.00000 | 0.00000 | 0.00000 | 0.00000 | 0.00000 | 0.00000 | 0.00000 | 0.00000 | 0.00000                | 0.00000 | 0.00000 | 0.00000 | 0.00000 | 0.00000 |         |
| NaOH                            | 0.00000 | 0.00000 | 0.00000 | 0.00000 | 0.00000 | 0.00000 | 0.00000 | 0.00000 | 0.00000 | 0.00000 | 0.00000 | 0.00000 | 0.00000 | 0.00000 | 0.00000 | 0.00000                | 0.00000 | 0.00000 | 0.00000 | 0.00000 | 0.00000 |         |
| NaCl                            | 0.00000 | 0.00000 | 0.00000 | 0.00000 | 0.00000 | 0.00000 | 0.00000 | 0.00000 | 0.00000 | 0.00000 | 0.00000 | 0.00000 | 0.00000 | 0.00000 | 0.00000 | 0.00000                | 0.00000 | 0.00000 | 0.00000 | 0.00000 | 0.00000 |         |
| Brine                           | 0.00000 | 0.00000 | 0.00000 | 0.00000 | 0.00000 | 0.00000 | 0.00000 | 0.00000 | 0.00000 | 0.00000 | 0.00000 | 0.00000 | 0.00000 | 0.00000 | 0.00000 | 0.00000                | 0.00000 | 0.00000 | 0.00000 | 0.00000 | 0.00000 |         |
| Ethanol                         | 0.00000 | 0.00000 | 0.00000 | 0.00000 | 0.00000 | 0.00000 | 0.00000 | 0.00000 | 0.00000 | 0.00000 | 0.00000 | 0.00000 | 0.00000 | 0.00000 | 0.00000 | 0.00000                | 0.00000 | 0.00000 | 0.00000 | 0.00000 | 0.00000 |         |
| Phosphoric acid                 | 0.00000 | 0.00000 | 0.00000 | 0.00000 | 0.00000 | 0.00000 | 0.00000 | 0.00000 | 0.00000 | 0.00000 | 0.00000 | 0.00000 | 0.00000 | 0.00000 | 0.00000 | 0.00000                | 0.00000 | 0.00000 | 0.00000 | 0.00000 | 0.00000 |         |
| 13                              | 0.00000 | 0.00000 | 0.00000 | 0.00000 | 0.00000 | 0.00000 | 0.00000 | 0.00000 | 0.00000 | 0.00000 | 0.00000 | 0.00000 | 0.00000 | 0.00000 | 0.00000 | 0.00000                | 0.00000 | 0.00000 | 0.00000 | 0.00000 | 0.00000 |         |

| Mass flow rate (kg/hr)          | 44<br>(solid) | 44<br>(solution) | 45      | 46      | 47      | 48      | 49      | 50      | 51      | 52      | 53      | 54      | 55      | 56      | 57      | 58<br>(solid) | 58<br>(solution) | 59      | 60      | 61      | 62      | 63      |
|---------------------------------|---------------|------------------|---------|---------|---------|---------|---------|---------|---------|---------|---------|---------|---------|---------|---------|---------------|------------------|---------|---------|---------|---------|---------|
| 1                               | 0.00000       | 0.00000          | 0.00000 | 0.00000 | 0.00000 | 0.00000 | 0.00000 | 0.00000 | 0.00000 | 0.00000 | 0.00000 | 0.00000 | 0.00000 | 0.00000 | 0.00000 | 0.00000       | 0.00000          | 0.00000 | 0.00000 | 0.00000 | 0.00000 | 0.00000 |
| H <sub>2</sub> O                | 0.00000       | 0.22857          | 0.22857 | 0.00000 | 0.22857 | 0.00000 | 0.00000 | 0.00000 | 0.00000 | 0.00000 | 0.00000 | 0.00000 | 0.00000 | 0.00000 | 0.20000 | 0.00000       | 0.20000          | 0.30000 | 0.00000 | 0.10000 | 0.04086 | 0.04086 |
| NH <sub>2</sub> NH <sub>2</sub> | 0.00000       | 0.00000          | 0.00000 | 0.00000 | 0.00000 | 0.00000 | 0.00000 | 0.00000 | 0.00000 | 0.00000 | 0.00000 | 0.00000 | 0.00000 | 0.00000 | 0.00000 | 0.00000       | 0.00000          | 0.00000 | 0.00000 | 0.00000 | 0.00000 | 0.00000 |
| 2                               | 0.00000       | 0.00000          | 0.00000 | 0.00000 | 0.00000 | 0.00000 | 0.00000 | 0.00000 | 0.00000 | 0.00000 | 0.00000 | 0.00000 | 0.00000 | 0.00000 | 0.00000 | 0.00000       | 0.00000          | 0.00000 | 0.00000 | 0.00000 | 0.00000 | 0.00000 |
| HCl                             | 0.00000       | 0.09698          | 0.09698 | 0.00000 | 0.09698 | 0.00000 | 0.00000 | 0.00000 | 0.00000 | 0.00000 | 0.00000 | 0.00000 | 0.00000 | 0.00214 | 0.00000 | 0.00000       | 0.00214          | 0.00214 | 0.00000 | 0.00000 | 0.00000 | 0.00000 |
| 2-propanol                      | 0.00000       | 0.00000          | 0.00000 | 0.00000 | 0.00000 | 0.00000 | 0.00000 | 0.00000 | 0.00000 | 0.00000 | 0.00000 | 0.00000 | 0.00000 | 0.00000 | 0.00000 | 0.00000       | 0.00000          | 0.00000 | 0.00000 | 0.00000 | 0.00000 | 0.00000 |
| dichloromethane                 | 0.00000       | 0.00000          | 0.00000 | 0.00000 | 0.00000 | 0.00000 | 0.00000 | 0.00000 | 0.00000 | 0.00000 | 0.00000 | 0.00000 | 0.00000 | 0.00000 | 0.00000 | 0.00000       | 0.00000          | 0.00000 | 0.00000 | 0.00000 | 0.00000 | 0.00000 |
| IPAc                            | 0.00000       | 0.00000          | 0.00000 | 0.00000 | 0.00000 | 0.00000 | 0.00000 | 0.00000 | 0.00000 | 0.00000 | 0.00000 | 0.00000 | 0.00000 | 0.00000 | 0.00000 | 0.00000       | 0.00000          | 0.00000 | 0.00000 | 0.00000 | 0.00000 | 0.00000 |
| 3                               | 0.00000       | 0.00000          | 0.00000 | 0.00000 | 0.00000 | 0.00000 | 0.00000 | 0.00000 | 0.00000 | 0.00000 | 0.00000 | 0.00000 | 0.00000 | 0.00000 | 0.00000 | 0.00000       | 0.00000          | 0.00000 | 0.00000 | 0.00000 | 0.00000 | 0.00000 |
| 4                               | 0.00000       | 0.00348          | 0.00348 | 0.00000 | 0.00348 | 0.00000 | 0.00000 | 0.00000 | 0.00000 | 0.00000 | 0.00000 | 0.00000 | 0.00000 | 0.00000 | 0.00000 | 0.00000       | 0.00000          | 0.00000 | 0.00000 | 0.00000 | 0.00000 | 0.00000 |
| Trifluoroacetic acid            | 0.00000       | 0.01182          | 0.01182 | 0.00000 | 0.01182 | 0.00000 | 0.00000 | 0.00000 | 0.00000 | 0.00000 | 0.00000 | 0.00000 | 0.00000 | 0.00000 | 0.00000 | 0.00000       | 0.00000          | 0.00000 | 0.00000 | 0.00000 | 0.00000 | 0.00000 |
| heptane                         | 0.00000       | 0.00000          | 0.00000 | 0.00000 | 0.00000 | 0.00000 | 0.00000 | 0.00000 | 0.00000 | 0.00000 | 0.00000 | 0.00000 | 0.00000 | 0.00000 | 0.00000 | 0.00000       | 0.00000          | 0.00000 | 0.00000 | 0.00000 | 0.00000 | 0.00000 |
| Superphosphoric acid            | 0.00000       | 0.05000          | 0.05000 | 0.00000 | 0.05000 | 0.00000 | 0.00000 | 0.00000 | 0.00000 | 0.00000 | 0.00000 | 0.00000 | 0.00000 | 0.00000 | 0.00000 | 0.00000       | 0.00000          | 0.00000 | 0.00000 | 0.00000 | 0.00000 | 0.00000 |
| 5                               | 0.00000       | 0.00390          | 0.00390 | 0.00000 | 0.00390 | 0.00000 | 0.00000 | 0.00000 | 0.00000 | 0.00000 | 0.00000 | 0.00000 | 0.00000 | 0.00000 | 0.00000 | 0.00000       | 0.00000          | 0.00000 | 0.00000 | 0.00000 | 0.00000 | 0.00000 |
| H <sub>2</sub> gas              | 0.00000       | 0.00000          | 0.00000 | 0.00000 | 0.00000 | 0.00000 | 0.00000 | 0.00000 | 0.00000 | 0.00000 | 0.00000 | 0.00000 | 0.00000 | 0.00000 | 0.00000 | 0.00000       | 0.00000          | 0.00000 | 0.00000 | 0.00000 | 0.00000 | 0.00000 |
| 6                               | 0.00000       | 0.00000          | 0.00000 | 0.00000 | 0.00000 | 0.00000 | 0.00000 | 0.00000 | 0.00000 | 0.00000 | 0.00000 | 0.00000 | 0.00000 | 0.00000 | 0.00000 | 0.00000       | 0.00000          | 0.00000 | 0.00000 | 0.00000 | 0.00000 | 0.00000 |
| 7                               | 0.01331       | 0.00548          | 0.00548 | 0.01331 | 0.00548 | 0.00000 | 0.00000 | 0.00000 | 0.00000 | 0.00000 | 0.00000 | 0.00000 | 0.01331 | 0.00000 | 0.00000 | 0.00000       | 0.00000          | 0.00000 | 0.00000 | 0.00000 | 0.00000 | 0.00000 |
| IPA                             | 0.00000       | 0.20000          | 0.20000 | 0.00000 | 0.01000 | 0.00000 | 0.00000 | 0.00000 | 0.00000 | 0.00000 | 0.00000 | 0.00000 | 0.00000 | 0.00000 | 0.00000 | 0.00000       | 0.00000          | 0.00000 | 0.00000 | 0.00000 | 0.00000 | 0.00000 |
| 8                               | 0.00000       | 0.00000          | 0.00000 | 0.00000 | 0.00000 | 0.01176 | 0.00000 | 0.00000 | 0.00000 | 0.01176 | 0.00035 | 0.00000 | 0.00035 | 0.00035 | 0.00000 | 0.00000       | 0.00035          | 0.00035 | 0.00000 | 0.00000 | 0.00000 | 0.00000 |
| 9                               | 0.00000       | 0.00000          | 0.00000 | 0.00000 | 0.00000 | 0.00000 | 0.00891 | 0.00000 | 0.00000 | 0.00891 | 0.00045 | 0.00000 | 0.00045 | 0.00045 | 0.00000 | 0.00000       | 0.00045          | 0.00045 | 0.00000 | 0.00000 | 0.00000 | 0.00000 |
| PivCl                           | 0.00000       | 0.00000          | 0.00000 | 0.00000 | 0.00000 | 0.00000 | 0.00000 | 0.00746 | 0.00000 | 0.00746 | 0.00746 | 0.00000 | 0.00746 | 0.00746 | 0.00000 | 0.00000       | 0.00746          | 0.00746 | 0.00000 | 0.00000 | 0.00000 | 0.00000 |
| IPEA                            | 0.00000       | 0.00000          | 0.00000 | 0.00000 | 0.00000 | 0.00000 | 0.00000 | 0.00000 | 0.01483 | 0.01483 | 0.01483 | 0.00000 | 0.01483 | 0.01483 | 0.00000 | 0.00000       | 0.01483          | 0.01483 | 0.00000 | 0.00000 | 0.00000 | 0.00000 |
| 10                              | 0.00000       | 0.00000          | 0.00000 | 0.00000 | 0.00000 | 0.00000 | 0.00000 | 0.00000 | 0.00000 | 0.00000 | 0.01858 | 0.00000 | 0.01858 | 0.00000 | 0.00000 | 0.00000       | 0.00000          | 0.00000 | 0.00000 | 0.00000 | 0.00000 | 0.00000 |
| by-product from R5              | 0.00000       | 0.00000          | 0.00000 | 0.00000 | 0.00000 | 0.00000 | 0.00000 | 0.00000 | 0.00000 | 0.00000 | 0.00129 | 0.00000 | 0.00129 | 0.00129 | 0.00000 | 0.00000       | 0.00129          | 0.00129 | 0.00000 | 0.00000 | 0.00000 | 0.00000 |
| TFA                             | 0.00000       | 0.00000          | 0.00000 | 0.00000 | 0.00000 | 0.00000 | 0.00000 | 0.00000 | 0.00000 | 0.00000 | 0.00201 | 0.00201 | 0.00201 | 0.00000 | 0.00000 | 0.00201       | 0.00201          | 0.00000 | 0.00000 | 0.00000 | 0.00000 | 0.00000 |
| 11                              | 0.00000       | 0.00000          | 0.00000 | 0.00000 | 0.00000 | 0.00000 | 0.00000 | 0.00000 | 0.00000 | 0.00000 | 0.00000 | 0.00000 | 0.00000 | 0.02387 | 0.00000 | 0.02111       | 0.00276          | 0.00276 | 0.02111 | 0.00000 | 0.00000 | 0.02111 |
| by-product from R6              | 0.00000       | 0.00000          | 0.00000 | 0.00000 | 0.00000 | 0.00000 | 0.00000 | 0.00000 | 0.00000 | 0.00000 | 0.00000 | 0.00000 | 0.00000 | 0.00588 | 0.00000 | 0.00000       | 0.00588          | 0.00588 | 0.00000 | 0.00000 | 0.00000 | 0.00000 |
| DMSO                            | 0.00000       | 0.00000          | 0.00000 | 0.00000 | 0.00000 | 0.00000 | 0.00000 | 0.00000 | 0.00000 | 0.00000 | 0.00000 | 0.00000 | 0.00000 | 0.00000 | 0.00000 | 0.00000       | 0.00000          | 0.10000 | 0.00000 | 0.10000 | 0.04086 | 0.04086 |
| <i>t</i> -PrNH <sub>2</sub>     | 0.00000       | 0.00000          | 0.00000 | 0.00000 | 0.00000 | 0.00000 | 0.00000 | 0.00000 | 0.00000 | 0.00000 | 0.00000 | 0.00000 | 0.00000 | 0.00000 | 0.00000 | 0.00000       | 0.00000          | 0.00000 | 0.00000 | 0.00000 | 0.00000 | 0.00000 |
| 12                              | 0.00000       | 0.00000          | 0.00000 | 0.00000 | 0.00000 | 0.00000 | 0.00000 | 0.00000 | 0.00000 | 0.00000 | 0.00000 | 0.00000 | 0.00000 | 0.00000 | 0.00000 | 0.00000       | 0.00000          | 0.00000 | 0.00000 | 0.00000 | 0.00000 | 0.00000 |
| Acetone                         | 0.00000       | 0.00000          | 0.00000 | 0.00000 | 0.00000 | 0.00000 | 0.00000 | 0.00000 | 0.00000 | 0.00000 | 0.00000 | 0.00000 | 0.00000 | 0.00000 | 0.00000 | 0.00000       | 0.00000          | 0.00000 | 0.00000 | 0.00000 | 0.00000 | 0.00000 |
| by-product from R7              | 0.00000       | 0.00000          | 0.00000 | 0.00000 | 0.00000 | 0.00000 | 0.00000 | 0.00000 | 0.00000 | 0.00000 | 0.00000 | 0.00000 | 0.00000 | 0.00000 | 0.00000 | 0.00000       | 0.00000          | 0.00000 | 0.00000 | 0.00000 | 0.00000 | 0.00000 |
| NaOH                            | 0.00000       | 0.00000          | 0.00000 | 0.00000 | 0.00000 | 0.00000 | 0.00000 | 0.00000 | 0.00000 | 0.00000 | 0.00000 | 0.00000 | 0.00000 | 0.00000 | 0.00000 | 0.00000       | 0.00000          | 0.00000 | 0.00000 | 0.00000 | 0.00000 | 0.00000 |
| NaCl                            | 0.00000       | 0.00000          | 0.00000 | 0.00000 | 0.00000 | 0.00000 | 0.00000 | 0.00000 | 0.00000 | 0.00000 | 0.00000 | 0.00000 | 0.00000 | 0.00000 | 0.00000 | 0.00000       | 0.00000          | 0.00000 | 0.00000 | 0.00000 | 0.00000 | 0.00000 |
| Brine                           | 0.00000       | 0.00000          | 0.00000 | 0.00000 | 0.00000 | 0.00000 | 0.00000 | 0.00000 | 0.00000 | 0.00000 | 0.00000 | 0.00000 | 0.00000 | 0.00000 | 0.00000 | 0.00000       | 0.00000          | 0.00000 | 0.00000 | 0.00000 | 0.00000 | 0.00000 |
| Ethanol                         | 0.00000       | 0.00000          | 0.00000 | 0.00000 | 0.00000 | 0.00000 | 0.00000 | 0.00000 | 0.00000 | 0.00000 | 0.00000 | 0.00000 | 0.00000 | 0.00000 | 0.00000 | 0.00000       | 0.00000          | 0.00000 | 0.00000 | 0.00000 | 0.00000 | 0.00000 |
| Phosphoric acid                 | 0.00000       | 0.00000          | 0.00000 | 0.00000 | 0.00000 | 0.00000 | 0.00000 | 0.00000 | 0.00000 | 0.00000 | 0.00000 | 0.00000 | 0.00000 | 0.00000 | 0.00000 | 0.00000       | 0.00000          | 0.00000 | 0.00000 | 0.00000 | 0.00000 | 0.00000 |
| 13                              | 0.00000       | 0.00000          | 0.00000 | 0.00000 | 0.00000 | 0.00000 | 0.00000 | 0.00000 | 0.00000 | 0.00000 | 0.00000 | 0.00000 | 0.00000 | 0.00000 | 0.00000 | 0.00000       | 0.00000          | 0.00000 | 0.00000 | 0.00000 | 0.00000 | 0.00000 |

| Mass flow rate (kg/hr)          | 64      | 65      | 66      | 67      | 68      | 69      | 70      | 71      | 72      | 73      | 74      | 75      | 76      | 77      | 78      | 79      | 80      | 81      | 82      | 83      | 84      | 85      |
|---------------------------------|---------|---------|---------|---------|---------|---------|---------|---------|---------|---------|---------|---------|---------|---------|---------|---------|---------|---------|---------|---------|---------|---------|
| 1                               | 0.00000 | 0.00000 | 0.00000 | 0.00000 | 0.00000 | 0.00000 | 0.00000 | 0.00000 | 0.00000 | 0.00000 | 0.00000 | 0.00000 | 0.00000 | 0.00000 | 0.00000 | 0.00000 | 0.00000 | 0.00000 | 0.00000 | 0.00000 | 0.00000 | 0.00000 |
| H <sub>2</sub> O                | 0.00000 | 0.04086 | 0.02724 | 0.06810 | 0.06810 | 0.04086 | 0.00070 | 0.04156 | 0.00000 | 0.00000 | 0.00000 | 0.00000 | 0.00000 | 0.00000 | 0.04156 | 0.04156 | 0.00000 | 0.00000 | 0.00000 | 0.00000 | 0.00000 | 0.00000 |
| NH <sub>2</sub> NH <sub>2</sub> | 0.00000 | 0.00000 | 0.00000 | 0.00000 | 0.00000 | 0.00000 | 0.00000 | 0.00000 | 0.00000 | 0.00000 | 0.00000 | 0.00000 | 0.00000 | 0.00000 | 0.00000 | 0.00000 | 0.00000 | 0.00000 | 0.00000 | 0.00000 | 0.00000 | 0.00000 |
| 2                               | 0.00000 | 0.00000 | 0.00000 | 0.00000 | 0.00000 | 0.00000 | 0.00000 | 0.00000 | 0.00000 | 0.00000 | 0.00000 | 0.00000 | 0.00000 | 0.00000 | 0.00000 | 0.00000 | 0.00000 | 0.00000 | 0.00000 | 0.00000 | 0.00000 | 0.00000 |
| HCl                             | 0.00000 | 0.00000 | 0.00000 | 0.00000 | 0.00000 | 0.00000 | 0.00030 | 0.00030 | 0.00000 | 0.00000 | 0.00000 | 0.00000 | 0.00000 | 0.00000 | 0.00027 | 0.00003 | 0.00030 | 0.00027 | 0.00000 | 0.00000 | 0.00000 | 0.00000 |
| 2-propanol                      | 0.00000 | 0.00000 | 0.00000 | 0.00000 | 0.00000 | 0.00000 | 0.00000 | 0.00000 | 0.00000 | 0.00000 | 0.00000 | 0.00000 | 0.00000 | 0.00000 | 0.00000 | 0.00000 | 0.00000 | 0.00000 | 0.00000 | 0.00000 | 0.00000 | 0.00000 |
| dichloromethane                 | 0.00000 | 0.00000 | 0.00000 | 0.00000 | 0.00000 | 0.00000 | 0.00000 | 0.00000 | 0.00000 | 0.00000 | 0.00000 | 0.00000 | 0.00000 | 0.00000 | 0.00000 | 0.00000 | 0.00000 | 0.00000 | 0.00000 | 0.00000 | 0.00000 | 0.00000 |
| IPAc                            | 0.00000 | 0.00000 | 0.00000 | 0.00000 | 0.00000 | 0.00000 | 0.00000 | 0.00000 | 0.20000 | 0.01190 | 0.18810 | 0.00190 | 0.19000 | 0.20000 | 0.00000 | 0.20000 | 0.01000 | 0.00400 | 0.36000 | 0.36400 | 0.20000 | 0.16400 |
| 3                               | 0.00000 | 0.00000 | 0.00000 | 0.00000 | 0.00000 | 0.00000 | 0.00000 | 0.00000 | 0.00000 | 0.00000 | 0.00000 | 0.00000 | 0.00000 | 0.00000 | 0.00000 | 0.00000 | 0.00000 | 0.00000 | 0.00000 | 0.00000 | 0.00000 | 0.00000 |
| 4                               | 0.00000 | 0.00000 | 0.00000 | 0.00000 | 0.00000 | 0.00000 | 0.00000 | 0.00000 | 0.00000 | 0.00000 | 0.00000 | 0.00000 | 0.00000 | 0.00000 | 0.00000 | 0.00000 | 0.00000 | 0.00000 | 0.00000 | 0.00000 | 0.00000 | 0.00000 |
| Trifluoroacetic acid            | 0.00000 | 0.00000 | 0.00000 | 0.00000 | 0.00000 | 0.00000 | 0.00000 | 0.00000 | 0.00000 | 0.00000 | 0.00000 | 0.00000 | 0.00000 | 0.00000 | 0.00000 | 0.00000 | 0.00000 | 0.00000 | 0.00000 | 0.00000 | 0.00000 | 0.00000 |
| heptane                         | 0.00000 | 0.00000 | 0.00000 | 0.00000 | 0.00000 | 0.00000 | 0.00000 | 0.00000 | 0.00000 | 0.00000 | 0.00000 | 0.00000 | 0.00000 | 0.00000 | 0.00000 | 0.00000 | 0.00000 | 0.00000 | 0.00000 | 0.00000 | 0.00000 | 0.00000 |
| Superphosphoric acid            | 0.00000 | 0.00000 | 0.00000 | 0.00000 | 0.00000 | 0.00000 | 0.00000 | 0.00000 | 0.00000 | 0.00000 | 0.00000 | 0.00000 | 0.00000 | 0.00000 | 0.00000 | 0.00000 | 0.00000 | 0.00000 | 0.00000 | 0.00000 | 0.00000 | 0.00000 |
| 5                               | 0.00000 | 0.00000 | 0.00000 | 0.00000 | 0.00000 | 0.00000 | 0.00000 | 0.00000 | 0.00000 | 0.00000 | 0.00000 | 0.00000 | 0.00000 | 0.00000 | 0.00000 | 0.00000 | 0.00000 | 0.00000 | 0.00000 | 0.00000 | 0.00000 | 0.00000 |
| H <sub>2</sub> gas              | 0.00000 | 0.00000 | 0.00000 | 0.00000 | 0.00000 | 0.00000 | 0.00000 | 0.00000 | 0.00000 | 0.00000 | 0.00000 | 0.00000 | 0.00000 | 0.00000 | 0.00000 | 0.00000 | 0.00000 | 0.00000 | 0.00000 | 0.00000 | 0.00000 | 0.00000 |
| 6                               | 0.00000 | 0.00000 | 0.00000 | 0.00000 | 0.00000 | 0.00000 | 0.00000 | 0.00000 | 0.00000 | 0.00000 | 0.00000 | 0.00000 | 0.00000 | 0.00000 | 0.00000 | 0.00000 | 0.00000 | 0.00000 | 0.00000 | 0.00000 | 0.00000 | 0.00000 |
| 7                               | 0.00000 | 0.00000 | 0.00000 | 0.00000 | 0.00000 | 0.00000 | 0.00000 | 0.00000 | 0.00000 | 0.00000 | 0.00000 | 0.00000 | 0.00000 | 0.00000 | 0.00000 | 0.00000 | 0.00000 | 0.00000 | 0.00000 | 0.00000 | 0.00000 | 0.00000 |
| IPA                             | 0.00000 | 0.00000 | 0.00000 | 0.00000 | 0.00000 | 0.00000 | 0.00000 | 0.00000 | 0.00000 | 0.00000 | 0.00000 | 0.00000 | 0.00000 | 0.00000 | 0.00000 | 0.00000 | 0.00000 | 0.00000 | 0.00000 | 0.00000 | 0.00000 | 0.00000 |
| 8                               | 0.00000 | 0.00000 | 0.00000 | 0.00000 | 0.00000 | 0.00000 | 0.00000 | 0.00000 | 0.00000 | 0.00000 | 0.00000 | 0.00000 | 0.00000 | 0.00000 | 0.00000 | 0.00000 | 0.00000 | 0.00000 | 0.00000 | 0.00000 | 0.00000 | 0.00000 |
| 9                               | 0.00000 | 0.00000 | 0.00000 | 0.00000 | 0.00000 | 0.00000 | 0.00000 | 0.00000 | 0.00000 | 0.00000 | 0.00000 | 0.00000 | 0.00000 | 0.00000 | 0.00000 | 0.00000 | 0.00000 | 0.00000 | 0.00000 | 0.00000 | 0.00000 | 0.00000 |
| PivCl                           | 0.00000 | 0.00000 | 0.00000 | 0.00000 | 0.00000 | 0.00000 | 0.00000 | 0.00000 | 0.00000 | 0.00000 | 0.00000 | 0.00000 | 0.00000 | 0.00000 | 0.00000 | 0.00000 | 0.00000 | 0.00000 | 0.00000 | 0.00000 | 0.00000 | 0.00000 |
| IPEA                            | 0.00000 | 0.00000 | 0.00000 | 0.00000 | 0.00000 | 0.00000 | 0.00000 | 0.00000 | 0.00000 | 0.00000 | 0.00000 | 0.00000 | 0.00000 | 0.00000 | 0.00000 | 0.00000 | 0.00000 | 0.00000 | 0.00000 | 0.00000 | 0.00000 | 0.00000 |
| 10                              | 0.00000 | 0.00000 | 0.00000 | 0.00000 | 0.00000 | 0.00000 | 0.00000 | 0.00000 | 0.00000 | 0.00000 | 0.00000 | 0.00000 | 0.00000 | 0.00000 | 0.00000 | 0.00000 | 0.00000 | 0.00000 | 0.00000 | 0.00000 | 0.00000 | 0.00000 |
| by-product from R5              | 0.00000 | 0.00000 | 0.00000 | 0.00000 | 0.00000 | 0.00000 | 0.00000 | 0.00000 | 0.00000 | 0.00000 | 0.00000 | 0.00000 | 0.00000 | 0.00000 | 0.00000 | 0.00000 | 0.00000 | 0.00000 | 0.00000 | 0.00000 | 0.00000 | 0.00000 |
| TFA                             | 0.00000 | 0.00000 | 0.00000 | 0.00000 | 0.00000 | 0.00000 | 0.00000 | 0.00000 | 0.00000 | 0.00000 | 0.00000 | 0.00000 | 0.00000 | 0.00000 | 0.00000 | 0.00000 | 0.00000 | 0.00000 | 0.00000 | 0.00000 | 0.00000 | 0.00000 |
| 11                              | 0.00000 | 0.02111 | 0.00001 | 0.02112 | 0.00003 | 0.00002 | 0.00000 | 0.00002 | 0.00000 | 0.00000 | 0.00000 | 0.00000 | 0.00000 | 0.00002 | 0.00000 | 0.00002 | 0.00002 | 0.00000 | 0.00000 | 0.00000 | 0.00000 | 0.00000 |
| by-product from R6              | 0.00000 | 0.00000 | 0.00000 | 0.00000 | 0.00000 | 0.00000 | 0.00000 | 0.00000 | 0.00000 | 0.00000 | 0.00000 | 0.00000 | 0.00000 | 0.00000 | 0.00000 | 0.00000 | 0.00000 | 0.00000 | 0.00000 | 0.00000 | 0.00000 | 0.00000 |
| DMSO                            | 0.00000 | 0.04086 | 0.02724 | 0.06810 | 0.06810 | 0.04086 | 0.00000 | 0.04086 | 0.00000 | 0.00000 | 0.00000 | 0.00000 | 0.00000 | 0.03677 | 0.00409 | 0.04086 | 0.03677 | 0.00000 | 0.00000 | 0.00000 | 0.00000 | 0.00000 |
| i-PrNH <sub>2</sub>             | 0.03074 | 0.03074 | 0.01943 | 0.05017 | 0.04857 | 0.02914 | 0.00000 | 0.02914 | 0.00000 | 0.00000 | 0.16065 | 0.00162 | 0.16227 | 0.17081 | 0.01898 | 0.18979 | 0.00854 | 0.00000 | 0.00000 | 0.00000 | 0.00000 | 0.00000 |
| 12                              | 0.00000 | 0.00000 | 0.00734 | 0.00734 | 0.01834 | 0.01101 | 0.00000 | 0.01101 | 0.00000 | 0.00000 | 0.00000 | 0.00000 | 0.00000 | 0.00099 | 0.01002 | 0.01101 | 0.00099 | 0.00000 | 0.00000 | 0.00000 | 0.00000 | 0.00000 |
| Acetone                         | 0.00000 | 0.00000 | 0.00105 | 0.00105 | 0.00262 | 0.00157 | 0.00000 | 0.00157 | 0.00000 | 0.00000 | 0.00000 | 0.00000 | 0.00000 | 0.00141 | 0.00016 | 0.00157 | 0.00141 | 0.00000 | 0.00000 | 0.00000 | 0.00000 | 0.00000 |
| by-product from R7              | 0.00000 | 0.00000 | 0.00405 | 0.00405 | 0.01011 | 0.00607 | 0.00000 | 0.00607 | 0.00000 | 0.00000 | 0.00000 | 0.00000 | 0.00000 | 0.00607 | 0.00000 | 0.00607 | 0.00607 | 0.00000 | 0.00000 | 0.00000 | 0.00000 | 0.00000 |
| NaOH                            | 0.00000 | 0.00000 | 0.00000 | 0.00000 | 0.00000 | 0.00000 | 0.00000 | 0.00000 | 0.00000 | 0.00000 | 0.00000 | 0.00000 | 0.00000 | 0.00000 | 0.00000 | 0.00000 | 0.00000 | 0.00000 | 0.00000 | 0.00000 | 0.00000 | 0.00000 |
| NaCl                            | 0.00000 | 0.00000 | 0.00000 | 0.00000 | 0.00000 | 0.00000 | 0.00000 | 0.00000 | 0.00000 | 0.00000 | 0.00000 | 0.00000 | 0.00000 | 0.00000 | 0.00000 | 0.00000 | 0.00000 | 0.00000 | 0.00000 | 0.00000 | 0.00000 | 0.00000 |
| Brine                           | 0.00000 | 0.00000 | 0.00000 | 0.00000 | 0.00000 | 0.00000 | 0.00000 | 0.00000 | 0.00000 | 0.00000 | 0.00000 | 0.00000 | 0.00000 | 0.00000 | 0.00000 | 0.00000 | 0.00000 | 0.00000 | 0.00000 | 0.00000 | 0.00000 | 0.00000 |
| Ethanol                         | 0.00000 | 0.00000 | 0.00000 | 0.00000 | 0.00000 | 0.00000 | 0.00000 | 0.00000 | 0.00000 | 0.00000 | 0.00000 | 0.00000 | 0.00000 | 0.00000 | 0.00000 | 0.00000 | 0.00000 | 0.00000 | 0.00000 | 0.00000 | 0.00000 | 0.00000 |
| Phosphoric acid                 | 0.00000 | 0.00000 | 0.00000 | 0.00000 | 0.00000 | 0.00000 | 0.00000 | 0.00000 | 0.00000 | 0.00000 | 0.00000 | 0.00000 | 0.00000 | 0.00000 | 0.00000 | 0.00000 | 0.00000 | 0.00000 | 0.00000 | 0.00000 | 0.00000 | 0.00000 |
| 13                              | 0.00000 | 0.00000 | 0.00000 | 0.00000 | 0.00000 | 0.00000 | 0.00000 | 0.00000 | 0.00000 | 0.00000 | 0.00000 | 0.00000 | 0.00000 | 0.00000 | 0.00000 | 0.00000 | 0.00000 | 0.00000 | 0.00000 | 0.00000 | 0.00000 | 0.00000 |

[illegible]

| Mass flow rate (kg/hr)          | 108     | 109     | 110     | 111     | 112     | 113     | 114 (solid) | 114 (solution) | 115     | 116     | 117     | 118     | 119     | 120     | 121     | 122     | 123     |
|---------------------------------|---------|---------|---------|---------|---------|---------|-------------|----------------|---------|---------|---------|---------|---------|---------|---------|---------|---------|
| 1                               | 0.00000 | 0.00000 | 0.00000 | 0.00000 | 0.00000 | 0.00000 | 0.00000     | 0.00000        | 0.00000 | 0.00000 | 0.00000 | 0.00000 | 0.00000 | 0.00000 | 0.00000 | 0.00000 | 0.00000 |
| H <sub>2</sub> O                | 0.00000 | 0.00000 | 0.00000 | 0.00126 | 0.00126 | 0.00126 | 0.00000     | 0.00126        | 0.00126 | 0.00126 | 0.00000 | 0.00000 | 0.00000 | 0.00000 | 0.00000 | 0.00000 | 0.00000 |
| NH <sub>2</sub> NH <sub>2</sub> | 0.00000 | 0.00000 | 0.00000 | 0.00000 | 0.00000 | 0.00000 | 0.00000     | 0.00000        | 0.00000 | 0.00000 | 0.00000 | 0.00000 | 0.00000 | 0.00000 | 0.00000 | 0.00000 | 0.00000 |
| 2                               | 0.00000 | 0.00000 | 0.00000 | 0.00000 | 0.00000 | 0.00000 | 0.00000     | 0.00000        | 0.00000 | 0.00000 | 0.00000 | 0.00000 | 0.00000 | 0.00000 | 0.00000 | 0.00000 | 0.00000 |
| HCl                             | 0.00000 | 0.00000 | 0.00000 | 0.00000 | 0.00000 | 0.00000 | 0.00000     | 0.00000        | 0.00000 | 0.00000 | 0.00000 | 0.00000 | 0.00000 | 0.00000 | 0.00000 | 0.00000 | 0.00000 |
| 2-propanol                      | 0.00000 | 0.00000 | 0.00000 | 0.00000 | 0.00000 | 0.00000 | 0.00000     | 0.00000        | 0.00000 | 0.00000 | 0.00000 | 0.00000 | 0.00000 | 0.00000 | 0.00000 | 0.00000 | 0.00000 |
| dichloromethane                 | 0.00000 | 0.00000 | 0.00000 | 0.00000 | 0.00000 | 0.00000 | 0.00000     | 0.00000        | 0.00000 | 0.00000 | 0.00000 | 0.00000 | 0.00000 | 0.00000 | 0.00000 | 0.00000 | 0.00000 |
| IPAc                            | 0.00000 | 0.00000 | 0.04000 | 0.00000 | 0.04000 | 0.04000 | 0.00000     | 0.04000        | 0.04000 | 0.00400 | 0.00000 | 0.00000 | 0.00000 | 0.00000 | 0.00000 | 0.00000 | 0.00000 |
| 3                               | 0.00000 | 0.00000 | 0.00000 | 0.00000 | 0.00000 | 0.00000 | 0.00000     | 0.00000        | 0.00000 | 0.00000 | 0.00000 | 0.00000 | 0.00000 | 0.00000 | 0.00000 | 0.00000 | 0.00000 |
| 4                               | 0.00000 | 0.00000 | 0.00000 | 0.00000 | 0.00000 | 0.00000 | 0.00000     | 0.00000        | 0.00000 | 0.00000 | 0.00000 | 0.00000 | 0.00000 | 0.00000 | 0.00000 | 0.00000 | 0.00000 |
| Trifluoroacetic acid            | 0.00000 | 0.00000 | 0.00000 | 0.00000 | 0.00000 | 0.00000 | 0.00000     | 0.00000        | 0.00000 | 0.00000 | 0.00000 | 0.00000 | 0.00000 | 0.00000 | 0.00000 | 0.00000 | 0.00000 |
| heptane                         | 0.00000 | 0.00000 | 0.00000 | 0.00000 | 0.00000 | 0.00000 | 0.00000     | 0.00000        | 0.00000 | 0.00000 | 0.00000 | 0.00000 | 0.00000 | 0.00000 | 0.00000 | 0.00000 | 0.00000 |
| Superphosphoric acid            | 0.00000 | 0.00000 | 0.00000 | 0.00000 | 0.00000 | 0.00000 | 0.00000     | 0.00000        | 0.00000 | 0.00000 | 0.00000 | 0.00000 | 0.00000 | 0.00000 | 0.00000 | 0.00000 | 0.00000 |
| 5                               | 0.00000 | 0.00000 | 0.00000 | 0.00000 | 0.00000 | 0.00000 | 0.00000     | 0.00000        | 0.00000 | 0.00000 | 0.00000 | 0.00000 | 0.00000 | 0.00000 | 0.00000 | 0.00000 | 0.00000 |
| H <sub>2</sub> gas              | 0.00000 | 0.00000 | 0.00000 | 0.00000 | 0.00000 | 0.00000 | 0.00000     | 0.00000        | 0.00000 | 0.00000 | 0.00000 | 0.00000 | 0.00000 | 0.00000 | 0.00000 | 0.00000 | 0.00000 |
| 6                               | 0.00000 | 0.00000 | 0.00000 | 0.00000 | 0.00000 | 0.00000 | 0.00000     | 0.00000        | 0.00000 | 0.00000 | 0.00000 | 0.00000 | 0.00000 | 0.00000 | 0.00000 | 0.00000 | 0.00000 |
| 7                               | 0.00000 | 0.00000 | 0.00000 | 0.00000 | 0.00000 | 0.00000 | 0.00000     | 0.00000        | 0.00000 | 0.00000 | 0.00000 | 0.00000 | 0.00000 | 0.00000 | 0.00000 | 0.00000 | 0.00000 |
| IPA                             | 0.00000 | 0.00000 | 0.00000 | 0.00000 | 0.00000 | 0.00000 | 0.00000     | 0.00000        | 0.00000 | 0.00000 | 0.00000 | 0.00000 | 0.00000 | 0.00000 | 0.00000 | 0.00000 | 0.00000 |
| 8                               | 0.00000 | 0.00000 | 0.00000 | 0.00000 | 0.00000 | 0.00000 | 0.00000     | 0.00000        | 0.00000 | 0.00000 | 0.00000 | 0.00000 | 0.00000 | 0.00000 | 0.00000 | 0.00000 | 0.00000 |
| 9                               | 0.00000 | 0.00000 | 0.00000 | 0.00000 | 0.00000 | 0.00000 | 0.00000     | 0.00000        | 0.00000 | 0.00000 | 0.00000 | 0.00000 | 0.00000 | 0.00000 | 0.00000 | 0.00000 | 0.00000 |
| PivCl                           | 0.00000 | 0.00000 | 0.00000 | 0.00000 | 0.00000 | 0.00000 | 0.00000     | 0.00000        | 0.00000 | 0.00000 | 0.00000 | 0.00000 | 0.00000 | 0.00000 | 0.00000 | 0.00000 | 0.00000 |
| IPEA                            | 0.00000 | 0.00000 | 0.00000 | 0.00000 | 0.00000 | 0.00000 | 0.00000     | 0.00000        | 0.00000 | 0.00000 | 0.00000 | 0.00000 | 0.00000 | 0.00000 | 0.00000 | 0.00000 | 0.00000 |
| 10                              | 0.00000 | 0.00000 | 0.00000 | 0.00000 | 0.00000 | 0.00000 | 0.00000     | 0.00000        | 0.00000 | 0.00000 | 0.00000 | 0.00000 | 0.00000 | 0.00000 | 0.00000 | 0.00000 | 0.00000 |
| by-product from R5              | 0.00000 | 0.00000 | 0.00000 | 0.00000 | 0.00000 | 0.00000 | 0.00000     | 0.00000        | 0.00000 | 0.00000 | 0.00000 | 0.00000 | 0.00000 | 0.00000 | 0.00000 | 0.00000 | 0.00000 |
| TFA                             | 0.00000 | 0.00000 | 0.00000 | 0.00000 | 0.00000 | 0.00000 | 0.00000     | 0.00000        | 0.00000 | 0.00000 | 0.00000 | 0.00000 | 0.00000 | 0.00000 | 0.00000 | 0.00000 | 0.00000 |
| 11                              | 0.00000 | 0.00000 | 0.00000 | 0.00000 | 0.00000 | 0.00000 | 0.00000     | 0.00000        | 0.00000 | 0.00000 | 0.00000 | 0.00000 | 0.00000 | 0.00000 | 0.00000 | 0.00000 | 0.00000 |
| by-product from R6              | 0.00000 | 0.00000 | 0.00000 | 0.00000 | 0.00000 | 0.00000 | 0.00000     | 0.00000        | 0.00000 | 0.00000 | 0.00000 | 0.00000 | 0.00000 | 0.00000 | 0.00000 | 0.00000 | 0.00000 |
| DMSO                            | 0.00000 | 0.00000 | 0.00000 | 0.00000 | 0.00000 | 0.00000 | 0.00000     | 0.00000        | 0.00000 | 0.00000 | 0.00000 | 0.00000 | 0.00000 | 0.00000 | 0.00000 | 0.00000 | 0.00000 |
| i-PrNH <sub>2</sub>             | 0.00000 | 0.00000 | 0.00000 | 0.00000 | 0.00000 | 0.00000 | 0.00000     | 0.00000        | 0.00000 | 0.00000 | 0.00000 | 0.00000 | 0.00000 | 0.00000 | 0.00000 | 0.00000 | 0.00000 |
| 12                              | 0.00000 | 0.00000 | 0.00987 | 0.00000 | 0.00987 | 0.00000 | 0.00000     | 0.00000        | 0.00000 | 0.00000 | 0.00000 | 0.00000 | 0.00000 | 0.00000 | 0.00000 | 0.00000 | 0.00000 |
| Acetone                         | 0.00000 | 0.00000 | 0.00000 | 0.00000 | 0.00000 | 0.00000 | 0.00000     | 0.00000        | 0.00000 | 0.00000 | 0.00000 | 0.00000 | 0.00000 | 0.00000 | 0.00000 | 0.00000 | 0.00000 |
| by-product from R7              | 0.00000 | 0.00000 | 0.00000 | 0.00000 | 0.00000 | 0.00000 | 0.00000     | 0.00000        | 0.00000 | 0.00000 | 0.00000 | 0.00000 | 0.00000 | 0.00000 | 0.00000 | 0.00000 | 0.00000 |
| NaOH                            | 0.00000 | 0.00000 | 0.00000 | 0.00000 | 0.00000 | 0.00000 | 0.00000     | 0.00000        | 0.00000 | 0.00000 | 0.00000 | 0.00000 | 0.00000 | 0.00000 | 0.00000 | 0.00000 | 0.00000 |
| NaCl                            | 0.00000 | 0.00000 | 0.00000 | 0.00000 | 0.00000 | 0.00000 | 0.00000     | 0.00000        | 0.00000 | 0.00000 | 0.00000 | 0.00000 | 0.00000 | 0.00000 | 0.00000 | 0.00000 | 0.00000 |
| Brine                           | 0.00000 | 0.00000 | 0.00000 | 0.00000 | 0.00000 | 0.00000 | 0.00000     | 0.00000        | 0.00000 | 0.00000 | 0.00000 | 0.00000 | 0.00000 | 0.00000 | 0.00000 | 0.00000 | 0.00000 |
| Ethanol                         | 0.01000 | 0.19000 | 0.20000 | 0.00000 | 0.20000 | 0.20000 | 0.00000     | 0.20000        | 0.20000 | 0.01000 | 0.00000 | 0.00000 | 0.00010 | 0.01000 | 0.00010 | 0.00990 | 0.01000 |
| Phosphoric acid                 | 0.00000 | 0.00000 | 0.00000 | 0.00713 | 0.00713 | 0.00475 | 0.00000     | 0.00475        | 0.00475 | 0.00475 | 0.00000 | 0.00000 | 0.00000 | 0.00000 | 0.00000 | 0.00000 | 0.00000 |
| 13                              | 0.00000 | 0.00000 | 0.00000 | 0.00000 | 0.00000 | 0.01225 | 0.01102     | 0.00122        | 0.00122 | 0.00122 | 0.01102 | 0.01102 | 0.00000 | 0.00000 | 0.00000 | 0.00000 | 0.00000 |

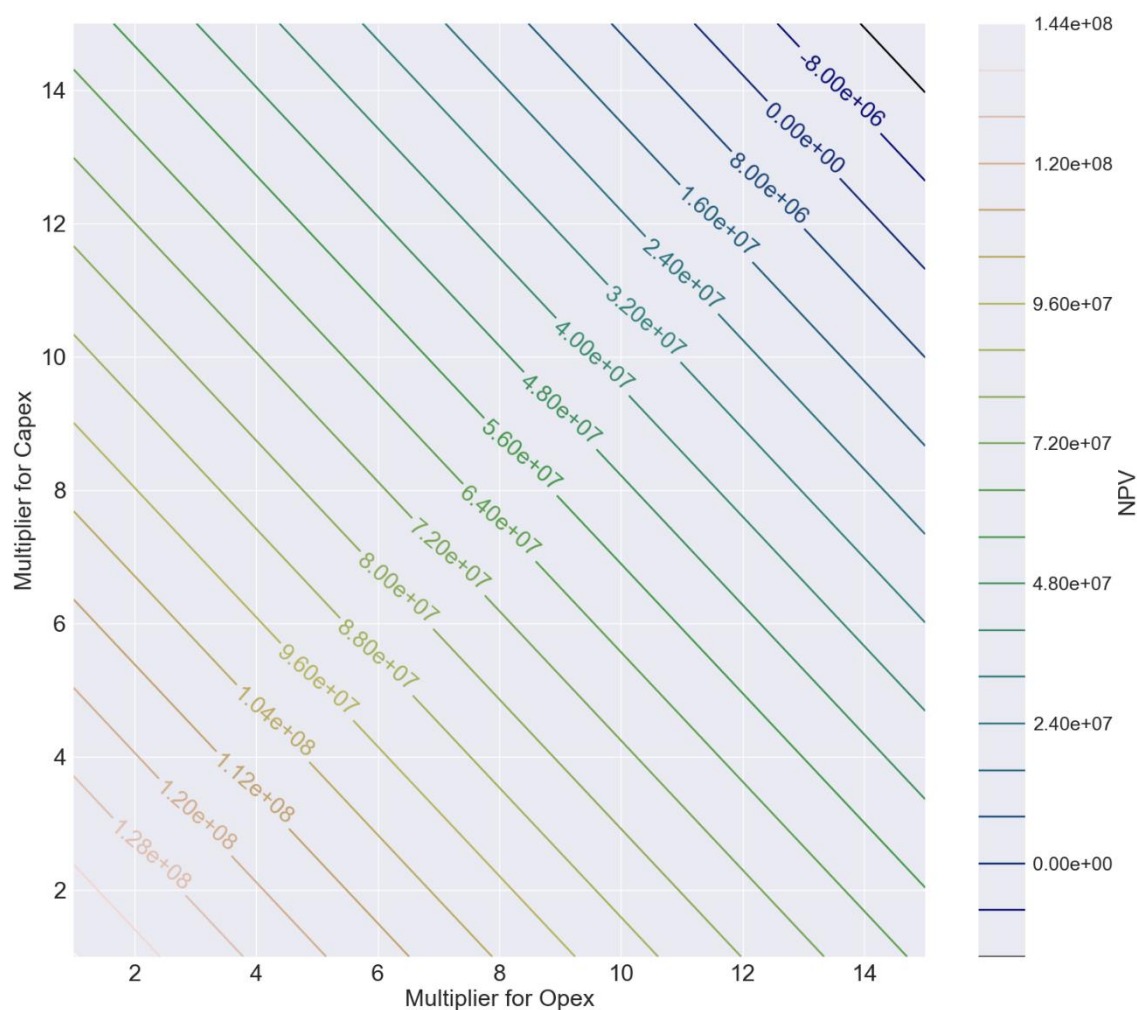

**Figure S2.** Sensitivity analysis on uncovered costs. To consider the effect of uncovered costs to NPV, current Opex and Capex have been multiplied into multiplier ranging from 1 to 15.

#### Reference:

- (1) Savile, C. K.; Janey, J. M.; Mundorff, E. C.; Moore, J. C.; Tam, S.; Jarvis, W. R.; Colbeck, J. C.; Krebber, A.; Fleitz, F. J.; Brands, J.; et al. Biocatalytic Asymmetric Synthesis of Chiral Amines from Ketones Applied to Sitagliptin Manufacture. *Science* (80-. ). **2010**, 329 (5989), 305–309.
- (2) pySOT documentation <http://pysot.readthedocs.io/en/latest/index.html> (accessed Jul 15, 2018).
- (3) Jolliffe, H. G.; Gerogiorgis, D. I. Plantwide Design and Economic Evaluation of Two Continuous Pharmaceutical Manufacturing (CPM) Cases: Ibuprofen and Artemisinin. *Comput. Chem. Eng.* **2016**, 91, 269–288.
- (4) United States Inflation Rate | 1914-2018 | Data | Chart | Calendar <https://tradingeconomics.com/united-states/inflation-cpi> (accessed Jul 27, 2018).

- (5) The Fed - Foreign Exchange Rates  
[https://www.federalreserve.gov/releases/h10/hist/dat00\\_uk.htm](https://www.federalreserve.gov/releases/h10/hist/dat00_uk.htm) (accessed Jul 31, 2018).
- (6) Source of solvent price - Fisher Scientific  
<https://www.fishersci.com/us/en/products/I9C8K3RF/solvents.html> (accessed Jul 27, 2018).
